# Supplementary material for: Transcriptome Analysis Revealed the Key Genes and Pathways Involved in Seed Germination of Maize Tolerant to Deep-Sowing
Source: MDPI journal article supplement (doi:10.3390/plants11030359), 2022-01-28
Supplement: s1 [file s1]

**Table S7.** Primer sequences of genes used for qRT-PCR detection

| Primers          | Sequences (5'-3')       |
|------------------|-------------------------|
| <i>Zmβ-TUB-F</i> | CTACCTCACGGCATCTGCTATGT |
| <i>Zmβ-TUB-R</i> | GTCACACACACTCGACTTCACG  |
| GRMZM2G405459-F  | CTCCATCAAGTCCCAGGTG     |
| GRMZM2G405459-R  | TGCGGAAGTAGCCGTTGTC     |
| GRMZM2G030790-F  | AAAGTCCAAGAAGGCTAAAG    |
| GRMZM2G030790-R  | CGCCCGTCTGGTTGTAG       |
| GRMZM5G809195-F  | CCTCGTCGGTGGTGAAG       |
| GRMZM5G809195-R  | CATGATCCTCAGCTTCTTGC    |
| GRMZM2G078465-F  | CGTGCTCGTCAACTCGTTCTAC  |
| GRMZM2G078465-R  | CTTGCTTTCTGCCGCCATT     |
| GRMZM2G103055-F  | TCTGTTTCCTCGTCCTTCTCG   |
| GRMZM2G103055-R  | CTTGCCCATCAGGAAGTTGTA   |
| GRMZM2G093286-F  | ACCACAGCACAAACGCAACG    |
| GRMZM2G093286-R  | CGAAGATGGCGAGGTAGGC     |
| GRMZM2G043338-F  | CGCTCACGGACTGGAAACTC    |
| GRMZM2G043338-R  | CAGTCTCGCCAGTAGCAAGGTC  |
| GRMZM2G067743-F  | TGTGACATTTTCGTTTCAGGTTG |
| GRMZM2G067743-R  | AAACGATCAAAATGACAGAGCC  |
| GRMZM2G337229-F  | GGTGAGATGCTACGGTTTC     |
| GRMZM2G337229-R  | GATTTGTCGCTTGGGTTTA     |
| GRMZM2G096435-F  | CCACAGCACAGCGAGCAT      |
| GRMZM2G096435-R  | CGTGAAGTAGCGGTACATCCAG  |
| GRMZM2G480954-F  | ACGGCATCCAGAGCAAGG      |
| GRMZM2G480954-R  | CATAACAGTCAACGAGCAAACC  |
| GRMZM2G168474-F  | GCTCAAGGGCAGCAAGCAG     |
| GRMZM2G168474-R  | TGGTGAACTCGGACAGGAACAT  |
